# Supplementary material for: In Vitro Hepatitis C Virus Infection and Hepatic Choline Metabolism
Source: PubMed Central journal article supplement (PMC7019665; doi:10.3390/v12010108), 2020-01-16

**Supplementary Table S1.** qPCR primer sequences.

| <i>Gene</i>                   | <i>Forward Primer</i>  | <i>Reverse Primer</i>   |
|-------------------------------|------------------------|-------------------------|
| <i>SLC44A1</i>                | TTTCCTGCTATGCCAAGTTTGC | CCAGAATGGTTAAGATCCACACA |
| <i>SLC44A2</i>                | AAAGGGAGGGAGAGTTTTGC   | CCCTTGGGTGGGTTTAGTTT    |
| <i>SLC44A3</i>                | GTCCAAAAGCAGACTCACTGT  | GCAAATAGGGAGTAGCACTCAGG |
| <i>SLC44A4</i>                | GGGATCAGCGGTCTTATTGA   | GCGCAGAAGCAAGATAAAC     |
| <i>SLC44A5</i>                | ACCCAGAAAGAGCAGCCTAT   | TTTAGCAACACGGAGGGACT    |
| <i>SLC22A1</i>                | TAATGGACCACATCGCTCAA   | ACCCCTGATAGAGCACAGA     |
| <i>SLC22A2</i>                | AAGAATGGGGAATCACAATGG  | AGATGTGGACGCCAAGATTC    |
| <i>SLC5A7</i>                 | TTGGTGGCCGAGATATTGGTT  | GCCATTGATATACCCTCCTCCG  |
| <i>PCYT1A</i>                 | CTCTGATGCAAGCGAAGAACC  | ATCACCGTGAAGCCTTTGAAG   |
| <i>CHKA</i>                   | CTTGGTGATGAGCCTCGGAA   | AAGTGACCTCTCTGCGAGAA    |
| <i>CHKB</i>                   | AGTCTCGGTTCCAGTTCTAC   | CTTCTGCTCGTTGTTCCTCC    |
| $\beta$ <i>ACTIN</i>          | CCAACCGCGAGAAGATGACC   | GGAGTCCATCACGATGCCAG    |
| <i>HSP90</i>                  | CCAGTTTGGTGTCGGTTTCTAT | CTGGGTATCGTTGTTGTGTTTTG |
| <i>JFH1 Hepatitis C Virus</i> | GTCTGCGGAACCGGTGAGTA   | GCCCAAATGGCCGGGATA      |

Supplementary Figure S1. FBS-cultured Huh7.5 choline transporter transcript expression

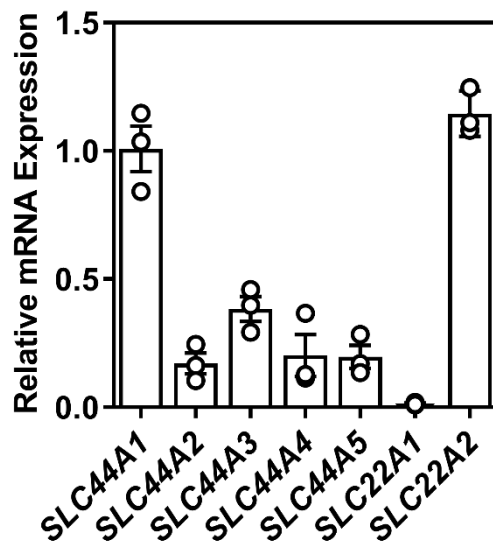

Supplementary Figure S1. FBS-cultured Huh7.5 choline transporter transcript expression. RNA was isolated from FBS-cultured Huh7.5 cells to measure choline transporter (*SLC44A1-5*; choline transporter-like 1-5, and *SLC22A1* and 2; organic cation transporter 1 and 2) transcript expression. All groups are shown relative to the expression of *SLC44A1* and normalized to the average of  $\beta$  *ACTIN* and *HSP90*.

Supplementary Figure S2. HS-cultured Huh7.5 choline uptake kinetics

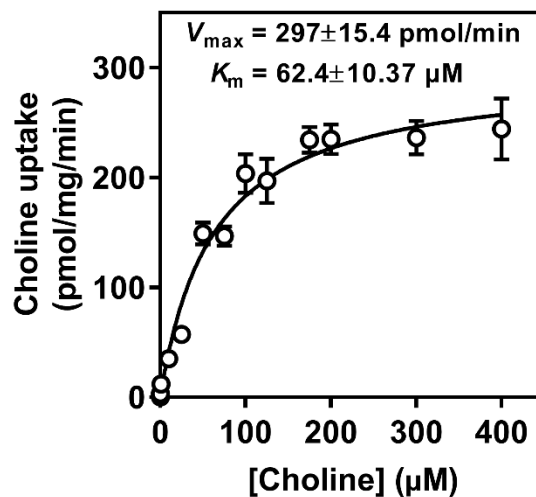

Supplementary Figure S2. HS-cultured Huh7.5 choline uptake kinetics. Choline uptake saturation kinetics from HS-cultured Huh7.5 cells, fit to a Michaelis-Menten curve. Data are mean  $\pm$  SEM and are representative of 3 independent experiments.

Supplementary Figure S3. Inhibition of choline transport in FBS-cultured infected cells

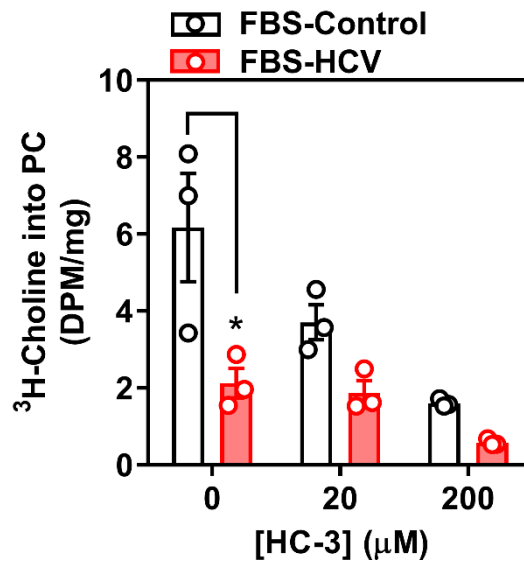

**Supplementary Figure S3.** Inhibition of choline transport in FBS-cultured infected cells. FBS-cultured Huh7.5 cells were infected at an MOI of 1 for 24 h in the presence or absence of 20 or 200 µM hemicholinium-3 (HC-3) to inhibit choline uptake. [<sup>3</sup>H]-choline incorporation into PC was measured. Data are mean ± SEM and are representative of 3 independent experiments. Statistical significance was determined by two-way ANOVA with a Tukey *post-hoc* analysis, such that \* represents *p* < 0.05 compared to uninfected vehicle control within inhibitor condition.

Supplementary Figure S4. Graphical abstract

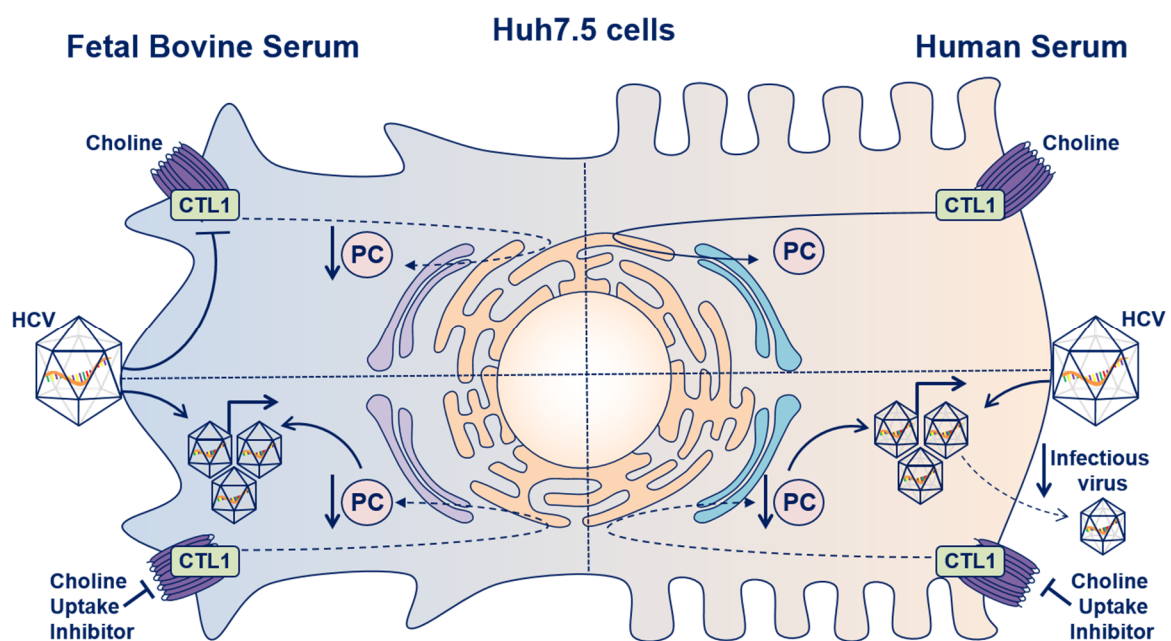

Supplement: viruses-12-00108-s001.pdf [file viruses-12-00108-s001.pdf]
